# Supplementary material
Source: PubMed Central journal article supplement (PMC11022838)
Supplement: NIHMS1969857-supplement-Figure_S1.pdf [file NIHMS1969857-supplement-Figure_S1.pdf]

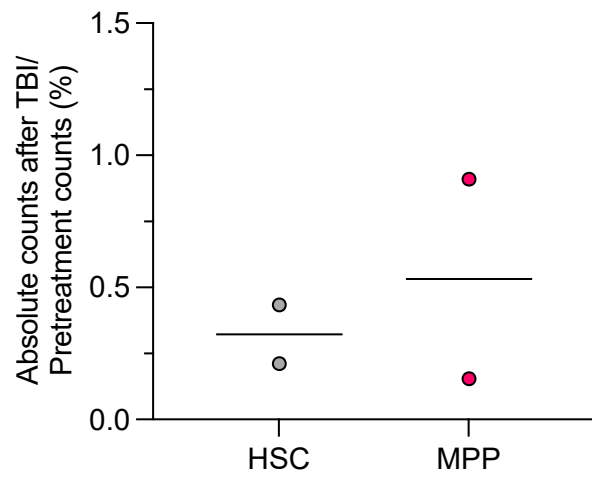

**Fig. S1. Bone marrow aspirates after 3Gy total body irradiation (TBI) were evaluated in two nonhuman primates.** Greater than 99% of hematopoietic stem cells (HSCs) and multipotent progenitors (MPPs) were deleted in the bone marrow. Horizontal lines indicate median.
