# Supplementary material
Source: PubMed Central journal article supplement (PMC11022838)
Supplement: NIHMS1969857-supplement-Figure_S2.pdf [file NIHMS1969857-supplement-Figure_S2.pdf]

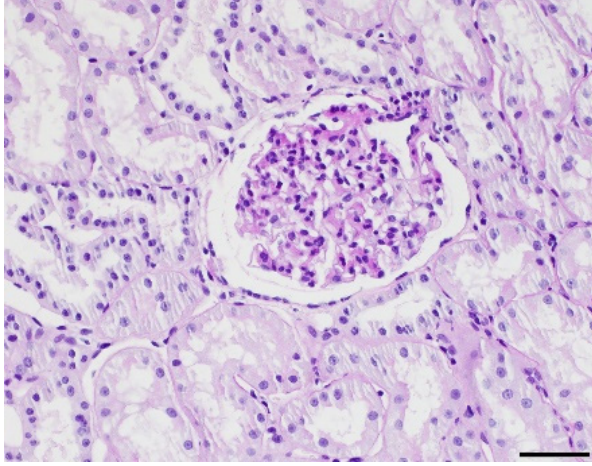

**Fig. S2. Kidney allograft biopsy from a Group A recipient.** The image shows no evidence of rejection on day 1022. (PAS stain; 40X; scale bar, 50  $\mu\text{m}$ ).
