# Supplementary material
Source: PubMed Central journal article supplement (PMC11022838)
Supplement: NIHMS1969857-supplement-Figure_S3.pdf [file NIHMS1969857-supplement-Figure_S3.pdf]

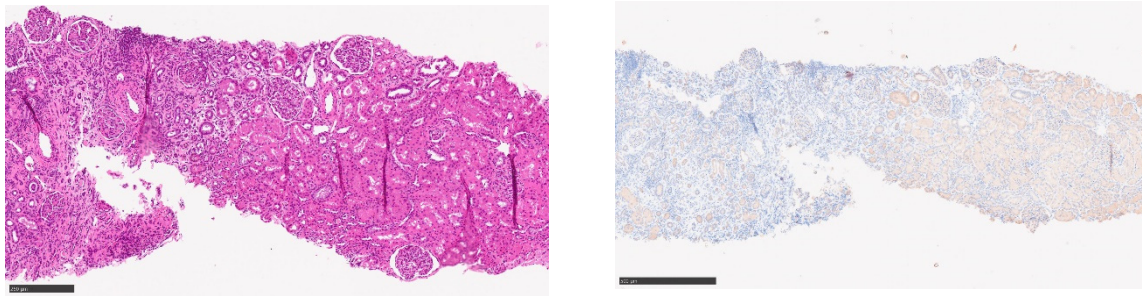

**Fig. S3. A day 826 biopsy from the only long-term recipient in Group B.** The image shows focal interstitial fibrosis and tubular atrophy with inflammation; borderline changes suggest acute cellular rejection (left panel, H&E stain; 10X; scale bar, 200  $\mu$ m). Shown on the right is C4d staining (10X; scale bar, 200  $\mu$ m). The Banff score for this sample is: g0, i1, t1, v0, ptc0, cg0, ci1, ct1, cv0, C4d1 (focal and weak staining). g, glomerulitis; i, interstitial inflammation; t, tubulitis; v, intimal arteritis; ptc, peritubular capillaritis; cg, glomerular basement membrane double contours; ci, interstitial fibrosis; ct, tubular atrophy; cv, vascular fibrous intimal thickening; C4d, staining by immunohistochemistry.
