# Supplementary material
Source: PubMed Central journal article supplement (PMC11022838)
Supplement: NIHMS1969857-supplement-Figure_S4.pdf [file NIHMS1969857-supplement-Figure_S4.pdf]

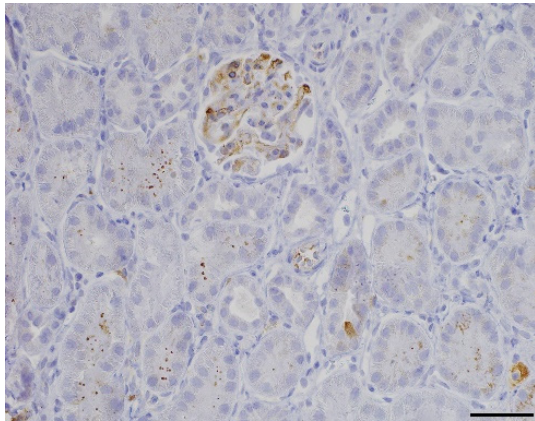

**Fig. S4. A day 804 allograft biopsy from a Group C recipient shows no C4d deposition.** The image was stained with an anti-C4d antibody (brown) (10X; scale bar, 50  $\mu$ m).
