# Supplementary material
Source: PubMed Central journal article supplement (PMC11022838)
Supplement: NIHMS1969857-supplement-Figure_S5.pdf [file NIHMS1969857-supplement-Figure_S5.pdf]

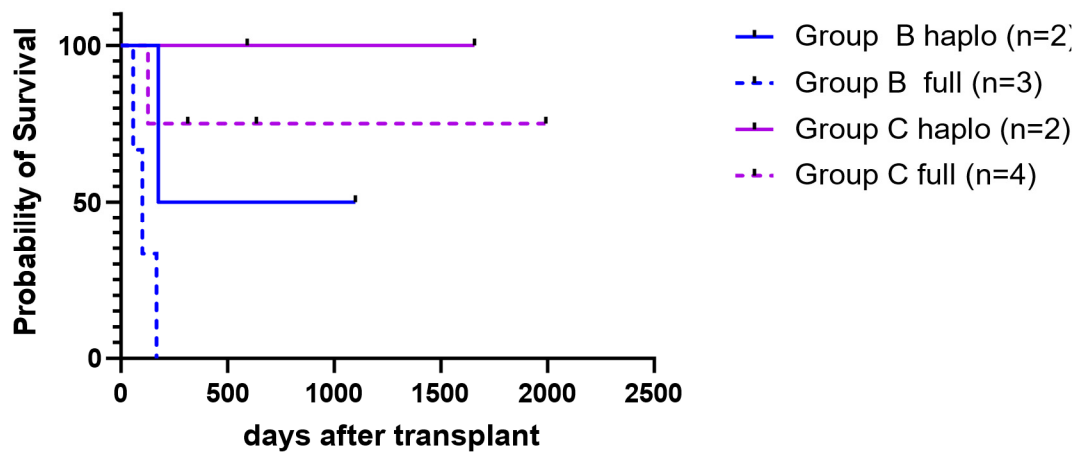

**Fig. S5. Major histocompatibility complex (MHC) haplotype did not result in differential graft survival.** There were no differences in renal allograft survival based on the degree of MHC disparity (haplotype versus full mismatch) in Group B and C recipients.
