# Supplementary material
Source: PubMed Central journal article supplement (PMC11022838)
Supplement: NIHMS1969857-supplement-Table_S1.pdf [file NIHMS1969857-supplement-Table_S1.pdf]

**Table S1: Minimal Detectable Effect Sizes for the Exact ( $n \leq 5$ ) and t-approximation ( $n \geq 6$ ) Wilcoxon Test.**

| Animals per Group | Effect Size |
|-------------------|-------------|
| 4                 | 3.0         |
| 5                 | 2.3         |
| 6                 | 1.8         |
| 7                 | 1.6         |
| 8                 | 1.5         |
