# Supplementary material
Source: PubMed Central journal article supplement (PMC11022838)
Supplement: NIHMS1969857-supplement-Table_S2.pdf [file NIHMS1969857-supplement-Table_S2.pdf]

**Table S2: Power for Fisher's Exact Test with 6 to 8 Animals Per Group.**

| <b>Group 1<br/>True Success<br/>Rate</b> | <b>Group 2<br/>True Success<br/>Rate</b> | <b>Power</b> |
|------------------------------------------|------------------------------------------|--------------|
| 0.05                                     | 0.85                                     | 0.83 – 0.96  |
| 0.05                                     | 0.90                                     | 0.92 – 0.99  |
| 0.05                                     | 0.95                                     | 0.98 – 0.99  |
| 0.10                                     | 0.85                                     | 0.71 – 0.90  |
| 0.10                                     | 0.90                                     | 0.82 – 0.96  |
| 0.10                                     | 0.95                                     | 0.92 – 0.99  |
| 0.15                                     | 0.85                                     | 0.61 – 0.82  |
| 0.15                                     | 0.90                                     | 0.72 – 0.90  |
| 0.15                                     | 0.95                                     | 0.83 – 0.96  |
