# Supplementary material
Source: PubMed Central journal article supplement (PMC11022838)
Supplement: NIHMS1969857-supplement-Table_S3.pdf [file NIHMS1969857-supplement-Table_S3.pdf]

**Table S3: Antibody list for flow cytometry.** N/A, not applicable.

| Antibody        | Clone   | Supplier        | Catalog number |
|-----------------|---------|-----------------|----------------|
| CD3             | SP34-2  | BD Biosciences  | 556611, 557749 |
| CD4             | L200    | BD Biosciences  | 552838         |
| CD8             | SK1     | BD Biosciences  | 344722         |
| CD20            | 2H7     | BioLegend       | 302324         |
| CD21            | B-ly4   | BD Biosciences  | 555422         |
| CD27            | M-T271  | BD Biosciences  | 557329         |
| CD28            | CD28.2  | BD Biosciences  | 555729         |
| CD34            | 563     | BD Biosciences  | 561209         |
| CD45RA          | 5H9     | BD Biosciences  | 556626         |
| CD90            | 5E10    | BioLegend       | 328124         |
| CD95            | DX2     | BD Biosciences  | 555673         |
| CD159a (NKG2Da) | Z199    | Beckman Coulter | IM3291U        |
| IgM             | G20-127 | BD Biosciences  | 551062         |
| FOXP3           | 236A/E7 | eBioscience     | 17-4777-42     |
| HLA-Bw6 (H38)   | N/A     | One Lambda      | FH0038         |
